# Supplementary material for: Impact of Atrazine Exposure on the Microbial Community Structure in a Brazilian Tropical Latosol Soil
Source: PubMed Central journal article supplement (PMC7308567; doi:10.1264/jsme2.me19143), 2020-04-09
Supplement: 35_19143_s1.pdf [file 35_19143_s1.pdf]

## Supplementary Material

Table S1. Conditions for qPCR reactions for *atzA* and *atzD* genes.

| <b>Pre-incubation</b> | <b>Denaturation</b> | <b>Annealing</b> | <b>Extension</b> | <b>Signal acquisition</b> |
|-----------------------|---------------------|------------------|------------------|---------------------------|
| 50°C - 2 min          | 95°C                | 60°              | 72°C             | 81°C                      |
| 95°C - 5 min          | 15 sec              | 30 sec           | 30 sec           | 15 sec                    |
| 40 cycles             |                     |                  |                  |                           |

Table S2. Conditions for qPCR reactions for *trzN*.

| <b>Pre-incubation</b> | <b>Denaturation</b> | <b>Annealing</b> | <b>Extension</b> |
|-----------------------|---------------------|------------------|------------------|
| 50°C - 2 min          | 95°C                | 55°              | 72°C             |
| 95°C - 5 min          | 45 sec              | 45 sec           | 45 sec           |
| 45 cycles             |                     |                  |                  |
